# Supplementary material
Source: Springer Nature journal article supplement (https://www.springermedizin.de/resource/supplementary/12916_2012_582_MOESM2_ESM.pdf/9598194)
Supplement: MOESM2 [file 9598194]

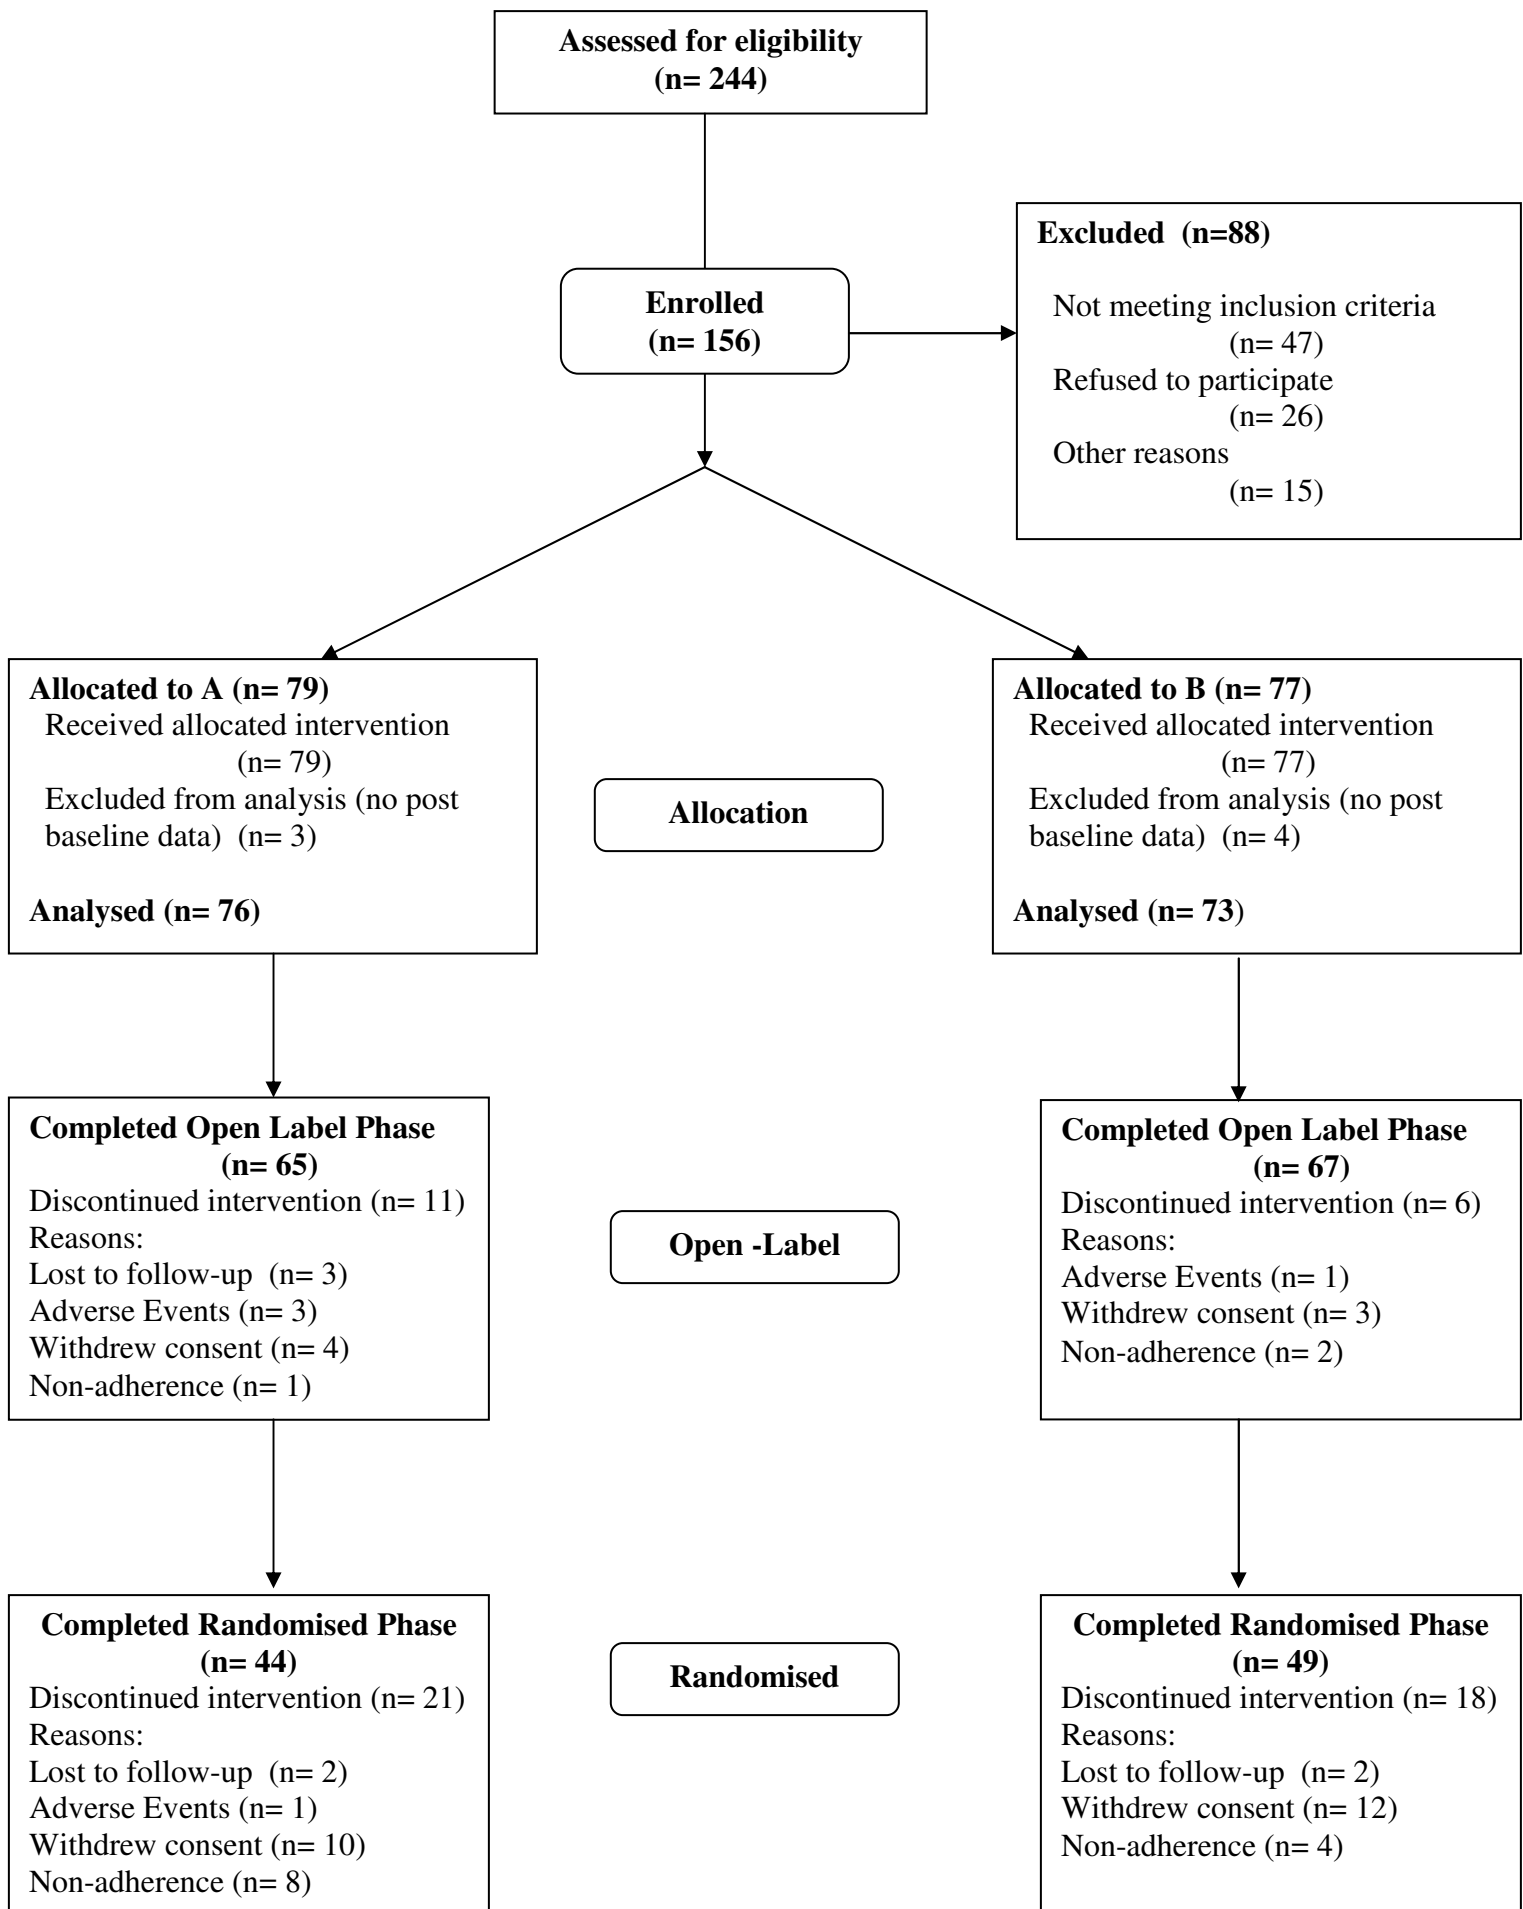

<sup>a</sup> Completion on primary outcome was defined as either completing all assessments up to and including the week 32 assessment and/or having an intervention for a mood event.
